1 **Body composition and blood pressure relationship among western-Kenya school children**  
2 **and adolescents**

3

4 **Authors**

5 Karani Magutah<sup>1</sup>, Grace Wambura Mbuthia<sup>2</sup> and Rebecca M. Meiring<sup>3</sup>

6 <sup>1</sup> School of Medicine, Moi University, Eldoret, Kenya.

7 <sup>2</sup> College of Health Sciences, Jomo Kenyatta University, Juja, Kenya.

8 <sup>3</sup> Department of Exercise Sciences, University of Auckland, Auckland, New Zealand.

9

10 Correspondent author: [jkarani@cartafrica.org](mailto:jkarani@cartafrica.org); [kmagutah@mu.ac.ke](mailto:kmagutah@mu.ac.ke); [kmagutah@gmail.com](mailto:kmagutah@gmail.com)

11

12 **Abstract**

13 Kenyan studies relating body composition (BC) and blood pressure (BP) have focused on adults.  
14 Insight into this relationship among children and adolescents provides evidence for reduction of  
15 adulthood cardiovascular disease-risk development. We describe BC and BP correlation among  
16 Kenyan children and adolescents.

17 This cross-sectional study randomly sampled 389 school-going participants. Weight, height, BP,  
18 waist circumference (WC) and hip circumference were measured. Waist-to-hip ratio (WHR),  
19 waist-to-height ratio (WHtR) and body-mass-index (BMI) were calculated. Relationships between  
20 BP and WC, WHR, WHtR and BMI were determined.

21 Males and females were  $14.7\pm 2.9$  and  $14.4\pm 2.5$  years old, respectively. Secondary and primary  
22 schools' males had SBP  $119.1\pm 10.3$  mmHg and  $107.4\pm 13.7$  mmHg; females  $111.2\pm 11.8$  mmHg  
23 and  $106.7\pm 11.7$  mmHg respectively. The DBP in secondary and primary schools' males was  
24  $69.2\pm 7.8$  mmHg and  $65.7\pm 8.6$  mmHg, and,  $69.6\pm 7.9$  mmHg and  $68.1\pm 7.4$  mmHg for females.  
25 Higher BMI, WC, and WHtR correlated with higher SBP in both sexes (Pearson's "R" +0.3 to  
26 +0.5;  $p < 0.05$ ). In females, DBP correlated with BMI, WC and WHtR, and only with WC for males.  
27 In all schools, only WC correlated with SBP in both sexes, BMI, WHR and WHtR correlating only  
28 among females. For males, BMI in primary and WHtR and WHR in secondary schools additionally  
29 correlated with SBP. For females, BMI and WHtR had correlations across school levels. For  
30 private and public schools, BMI, WC and WHtR had +0.2 to +0.6 correlations with SBP. The DBP  
31 correlated with WC and WHtR among private schools' males, and, with WHtR and BMI in both  
32 school sets for females.

33 For both sexes, WC had strongest and WHR weakest correlation with SBP. Only in secondary  
34 school females did DBP correlate some BC variables. In both sexes, BMI, WC and WHtR all fairly  
35 correlated with SBP in private and public schools, WHR appearing least applicable in predicting  
36 Kenyan children and adolescents' BP.

37

### 38 **Introduction:**

39 While much has been done on the relationship between body composition (BC) and blood pressure  
40 (BP), most research has focused on adults. Waist circumference (WC), body mass, waist-hip ratio  
41 (WHR), waist-height ratio (WHtR) and body mass index (BMI) are all either independently or in  
42 combination positively correlated with BP in adult males and females (1). What remains unclear  
43 is how various BC variables correlate with BP among the sexes and age groups. In Africa,

44 childhood onset hypertension is currently on the rise (2). Among younger adults WC and WHR  
45 have more predictive power than BMI for occurrence of high BP, and, while WHR correlates more  
46 positively with Systolic BP (SBP), it is WC that correlates stronger with Diastolic BP (DBP) (3).  
47 Among children and adolescents, such relationships remain unresolved. We do not know as yet  
48 what BC variables confer the strongest association with higher BP for boys and girls, and, in  
49 Kenya, we additionally do not know exactly how the various BC components relate with BP for  
50 our children and adolescents.

51 The available studies focusing on BP and BC relationships in children and adolescents are all from  
52 outside Kenya and as far as we are aware, there is no literature available in this group in Kenya.  
53 Insight on the relationship between BP and the various BC variables in this group is needed, where  
54 available data are in adults and older youths aged 18-35 years, where BC factors like BMI  $\geq 25$  had  
55 3.05 likelihood odds individuals were hypertensive (4). For those from primary school children  
56 only, up to 42% had elevated to stage 1 hypertension BPs and those overweight or obese had higher  
57 likelihood for elevated or hypertensive BP values (5). The current study provides the first attempt  
58 to describe the relationship between BC variables and BP in a western Kenya cohort of children  
59 and adolescents from both primary and secondary schools, extending the study age to 18 years.

60 Recent studies from elsewhere across the globe have shown mixed results in the relationship  
61 between various BC variables and BP in children and adolescents (6-9). In urban South Africa for  
62 instance, while weight, BMI and WC have positive correlations with both SBP and DBP, WHR  
63 showed no such correlation. In data disaggregated based on sex however, weight, BMI and WC  
64 correlate with SBP for both boys and girls but not in DBP among boys, and this is true for girls  
65 regards WC (8, 9). Other studies from both similar and different populations suggest that weight  
66 and BMI positively correlates with both SBP and DBP in boys and girls, and that high WHtR also

67 compares with higher BP (7, 10). Studies have also shown that these factors though interrelated  
68 can independently cause higher BP in isolation even where the other variables of body composition  
69 are normal. Higher values of WC for instance correlates with higher BP even in individuals with  
70 normal BMI (11).

71 The aim of this study was to describe the correlation between BC variables and BP among children  
72 and adolescents from primary and secondary, and, also, private and public schools in Kenya.

### 73 **Methods:**

74 **Design and Setting:** A cross-sectional observational study was conducted among residents of  
75 metropolis of Eldoret in North-West of Kenya.

76 **Study population:** Children and adolescents aged 11-18 years and were residents of Eldoret town  
77 currently attending either primary or secondary schools under the Kenyan curriculum.

78 **Sample size and Sampling Procedure:** A total of 389 participants were sampled from public and  
79 private schools, all drawn from the upper grades of primary school and the four secondary school  
80 levels.. This was done by listing all schools in each category (primary (private and public) and  
81 secondary (private and public) and writing their names on ballot papers, and from each, two were  
82 randomly picked to, yielding 8 schools. All agreed to participate and were included. Using the  
83 class registers from the selected schools, proportioned random sampling was employed based on  
84 the class size against the desired total sample, approximating a representation of 12 participants  
85 per grade in each school.

### 86 **Eligibility**

87 Children and adolescents aged between 11-18 years attending school within Eldoret were included.  
88 Children and adolescents with physical disabilities that could compromise engagement in PA and  
89 exercises, and those on medication that alters BP or BC were excluded.

#### 90 **Protocol Description and Data Collection:**

91 For this study, the first participant was recruited on 6th March 2023 and engagement with the  
92 last participant was on 28th April 2023. These children and adolescents were assented and their  
93 respective parents / guardians gave written-informed consent for before participation. A  
94 CAMRY Mechanical scale (BR9012, Shanghai, China) was used to measure body weight  
95 (kilograms) with participants wearing light clothing. Height was measured using a tape measure  
96 and taken while standing upright with eyes fixed directly ahead, and without wearing shoes. BP  
97 (mmHg) was measured after 5 minutes of rest in an upright-seated position. An Omron M2 Basic  
98 (HEM-7120-E) automatic BP monitor (Omron Healthcare Co. Ltd, Kyoto, Japan) was used to  
99 measure BP on the left upper arm. Measurements were taken twice, spaced two minutes apart,  
100 and the average of the two measurements was recorded. The WC was determined by “just  
101 snugly” passing a tape horizontally just above the iliac crest, with the lower part of tape barely  
102 touching the upper part of the crest and the hip circumference was taken as the measured  
103 distance around the widest part of the buttocks (12, 13). All tape-measure values were in  
104 centimeters. Using these measurements, BMI, WHtR and WHR were determined. The set cut-  
105 offs for WHtR were  $\geq 0.463$  for boys and  $\geq 0.469$  for girls (14-16), and  $\geq 0.90$  (male) and  $\geq 0.85$   
106 (female) for WHR (13). We used a 95 percentile of adult values for BMI, applied amongst <13  
107 year old, while those  $\geq 13$  years retained adult categorization (17, 18). Normal BP was taken as  
108 values <120/80 for ages  $\geq 13$  years (18).

109 **Data Management and Analysis:** Analyses were performed using STATA v.13 at univariate  
110 level for BP, WC, WHR, WHtR and BMI data into means and standard deviations. For the  
111 relationship between the BC variables and both SBP and DBP, the bivariate Pearson’s correlations  
112 (“R”) were performed. Chi-squared tests were performed for BP comparisons between sexes. The  
113 P value for significance was set at  $\leq 0.05$ .

114 **Ethical Consideration:** The Moi Teaching and Referral Hospital / Moi University Institutional  
115 Research Ethics Committee (MTRH/MU IREC) approved this research (approval number FAN:  
116 0004291) on 22<sup>nd</sup> November 2022 and, further, the National Commission for Science, Technology  
117 and Innovation (*NACOSTI*) provided permit to carry out the study Ref number 839919 on 1<sup>st</sup>  
118 March 2023. Written assent was provided by all children and adolescents and their  
119 parents/guardians gave informed-written consent for the participants to be enrolled.

## 120 **Results**

121 For the current study, 37.4% of participants were male and 62.6% were female with mean $\pm$ SD  
122 ages 14.7 $\pm$ 2.9 and 14.4 $\pm$ 2.5 years respectively. The proportions from secondary and primary  
123 schools were 46.9% (public, 33.8%; private 13.1%) and 53.1% (public, 22.6%; private, 30.5%)  
124 respectively. Participants were all from the 5<sup>th</sup> grade (seven years in school) of primary schools up  
125 to 4<sup>th</sup> form (Fourteen years in school) in the Kenyan education system. Of these participants, 7.6%  
126 (n=29) had hypertensive pressure  $\geq 130$  mmHg ( $\geq 124$  mmHg for <13 year old) using SBP, 18.5%  
127 had prehypertensive SBP 120-129 mmHg (114-123 mmHg for <13 year old) and 73.9% had  
128 normal SBP. Using DBP, 7.3% (n=28) of participants were prehypertensive (80-89 mmHg ( $\geq 76$ -  
129 85 mmHg) for <13 years old)). Combining SBP and DBP, 8.1% (n=31) of participants (9.3%  
130 (n=13), males; 7.4%, females (n=18)) were prehypertensive-to-hypertensive and males had higher

131 SBP compared to females ( $\chi^2 = 9.81$ ;  $p = 0.007$ ). Table 1 provides characteristics of the study  
 132 participants per sex and school categories.

133

134 **Table 1; Characteristics of Study Participants.**

| Variable                 | Mean $\pm$ SD              |                          |                              |                            |
|--------------------------|----------------------------|--------------------------|------------------------------|----------------------------|
| Sex, School              | Boys, Secondary Sch (n=62) | Boys, Primary Sch (n=84) | Girls, Secondary Sch (n=120) | Girls, Primary Sch (n=123) |
| Age (years)              | 17.5 $\pm$ 2.0             | 12.7 $\pm$ 1.4           | 16.6 $\pm$ 1.4               | 12.4 $\pm$ 1.2             |
| Height (cm)              | 170 $\pm$ 8.2              | 154.8 $\pm$ 11.2         | 160.5 $\pm$ 8.2              | 154.5 $\pm$ 9.8            |
| Weight (Kgs)             | 60.7 $\pm$ 9.3             | 42.1 $\pm$ 10.6          | 57.6 $\pm$ 11.6              | 44.4 $\pm$ 10.7            |
| Waist (cm)               | 79.0 $\pm$ 7.5             | 68.5 $\pm$ 7.8           | 75.6 $\pm$ 10.3              | 66.9 $\pm$ 8.6             |
| Hip (cm)                 | 91.6 $\pm$ 7.3             | 79.7 $\pm$ 8.5           | 97.0 $\pm$ 9.1               | 84.6 $\pm$ 9.3             |
| BMI (kg/m <sup>2</sup> ) | 21.0 $\pm$ 2.9             | 17.4 $\pm$ 2.6           | 22.4 $\pm$ 4.0               | 18.4 $\pm$ 3.1             |
| SBP (mmHg)               | 119.1 $\pm$ 10.3           | 107.4 $\pm$ 13.7         | 111.2 $\pm$ 11.8             | 106.7 $\pm$ 11.7           |
| DBP (mmHg)               | 69.2 $\pm$ 7.8             | 65.7 $\pm$ 8.6           | 69.6 $\pm$ 7.9               | 68.1 $\pm$ 7.4             |
| WC (cm)                  | 79.0 $\pm$ 7.5             | 68.5 $\pm$ 7.8           | 75.6 $\pm$ 10.3              | 66.9 $\pm$ 8.6             |
| WHR                      | 0.86 $\pm$ 0.07            | 0.86 $\pm$ 0.06          | 0.78 $\pm$ 0.07              | 0.79 $\pm$ 0.06            |
| WHtR                     | 0.46 $\pm$ 0.04            | 0.44 $\pm$ 0.04          | 0.47 $\pm$ 0.06              | 0.43 $\pm$ 0.05            |

135 SD, standard deviation; cm, centimeters; Kgs, Kilograms; BMI, body mass index; kg/m<sup>2</sup>, kilogram  
 136 per meter squared; SBP, systolic blood pressure; mmHg, millimeters of mercury; DBP, diastolic  
 137 blood pressure; WC, waist circumference; WHR, waist hip ratio; WHtR, waist height ratio.

138

139 For both males and females, higher BMI, WC and WHtR all had significant positive relationships  
 140 with SBP (all  $p < 0.05$ ). The WHR had significant positive relationship with SBP in females but  
 141 not males. For DBP however, there were mixed results with BMI and WHtR having a significant

142 positive correlation among females but not males, and, for both sexes, WC positively correlating  
 143 with DBP while WHR had no correlation whatsoever. These correlations are presented in table 2.

144

145 **Table 2; Pearson’s Correlations of various BC Variables to SBP and DBP**

| Variable (males (n=138) and females (n=241), respectively) | Correlation coefficient ‘r’ (p-value) |              |
|------------------------------------------------------------|---------------------------------------|--------------|
|                                                            | SBP                                   | DBP          |
| BMI                                                        | 0.40 (<0.01)                          | 0.13 (0.13)  |
|                                                            | 0.32 (<0.01)                          | 0.30 (<0.01) |
| WC                                                         | 0.50 (<0.01)                          | 0.22 (0.01)  |
|                                                            | 0.43 (<0.01)                          | 0.27 (<0.01) |
| WHR                                                        | 0.10 (0.25)                           | 0.02 (0.79)  |
|                                                            | 0.31 (<0.01)                          | 0.12 (0.05)  |
| WHtR                                                       | 0.27 (<0.01)                          | 0.16 (0.07)  |
|                                                            | 0.38 (<0.01)                          | 0.29 (<0.01) |

146 BMI, body mass index; SBP, systolic blood pressure; DBP, diastolic blood pressure; WC, waist  
 147 circumference; WHR, waist hip ratio; WHtR, waist height ratio.

148

149 Correlating the various BC variable to both SBP and DBP based on sex and whether participants  
 150 were in primary or secondary school levels had mixed results. Across both sexes and in all school  
 151 levels, WC was the only one with a positive significant correlation with SBP. Additionally, BMI,  
 152 WHR and WHtR all showed positive correlation to SBP among females in both primary and



153 secondary schools. For males, other than WC, BMI in primary school boys and both WHR and  
 154 WHtR in secondary school boys correlated with SBP. No BC variable correlated with DBP for  
 155 males in all school levels. For girls, there was a correlation between DBP and all of BMI, WC and  
 156 WHtR in secondary schools and BMI and WHtR for primary schools. This is shown in table 3.

157  
 158 **Table 3; Pearson’s Correlations of various BC variables to SBP and DBP based on school**  
 159 **level**

| Variable    | Correlation coefficient ‘r’ (p value) |                          |                              |                             |
|-------------|---------------------------------------|--------------------------|------------------------------|-----------------------------|
| Sex, School | Boys, Secondary Sch (n=58)            | Boys, Primary Sch (n=80) | Girls, Secondary Sch (n=119) | Girls, Primary, Sch (n=122) |
| <b>BMI</b>  |                                       |                          |                              |                             |
| SBP         | 0.06 (0.64)                           | 0.31 (<0.01)             | 0.28 (<0.01)                 | 0.26 (<0.01)                |
| DBP         | -0.05 (0.72)                          | 0.07 (0.52)              | 0.37 (<0.01)                 | 0.19 (0.03)                 |
| <b>WC</b>   |                                       |                          |                              |                             |
| SBP         | 0.30 (0.02)                           | 0.39 (<0.01)             | 0.35 (<0.01)                 | 0.44 (<0.01)                |
| DBP         | 0.13 (0.35)                           | 0.13 (0.26)              | 0.35 (<0.01)                 | 0.14 (0.12)                 |
| <b>WHR</b>  |                                       |                          |                              |                             |
| SBP         | 0.28 (0.03)                           | 0.002 (0.99)             | 0.33 (<0.01)                 | 0.34 (<0.01)                |
| DBP         | 0.11 (0.41)                           | -0.04 (0.70)             | 0.20 (0.03)                  | 0.05 (0.58)                 |
| <b>WHtR</b> |                                       |                          |                              |                             |
| SBP         | 0.29 (0.02)                           | 0.14 (0.21)              | 0.28 (<0.01)                 | 0.42 (<0.01)                |
| DBP         | 0.21 (0.11)                           | 0.06 (0.62)              | 0.34 (<0.01)                 | 0.21 (0.03)                 |

160 BMI, body mass index; SBP, systolic blood pressure; DBP, diastolic blood pressure; WC, waist  
 161 circumference; WHR, waist hip ratio; WHtR, waist height ratio.

162

163 When analyses were based on whether participants were in private or public schools, BMI, WC  
 164 and WHtR all positively correlated with the SBP. A significant correlation between WHR and SBP  
 165 was only found in females from public schools. There were mixed results pertains DBP. Among  
 166 males in private schools, WC and WHtR correlated with DBP, and there was no correlation for  
 167 BC variables for those from public schools. The WC, WHtR and BMI correlated with DBP among  
 168 females from both sets of schools. These correlations are presented in table 4.

169 **Table 4; Pearson’s Correlations of various BC variables to SBP and DBP based on school**  
 170 **type**

| Variable    | Correlation coefficient ‘r’ (p value) |                         |                       |                       |
|-------------|---------------------------------------|-------------------------|-----------------------|-----------------------|
| Sex, School | Boys, private sch (n=80)              | Boys, Public sch (n=58) | Girls, private (n=86) | Girls, public (n=155) |
| <b>BMI</b>  |                                       |                         |                       |                       |
| SBP         | 0.41 (<0.01)                          | 0.39 (<0.01)            | 0.37 (<0.01)          | 0.33 (<0.01)          |
| DBP         | 0.16 (0.16)                           | 0.09 (0.49)             | 0.29 (0.01)           | 0.30 (<0.01)          |
| <b>WC</b>   |                                       |                         |                       |                       |
| SBP         | 0.41 (<0.01)                          | 0.60 (<0.01)            | 0.30 (0.01)           | 0.46 (<0.01)          |
| DBP         | 0.33 (<0.01)                          | 0.08 (0.53)             | 0.25 (0.02)           | 0.29 (<0.01)          |
| <b>WHR</b>  |                                       |                         |                       |                       |
| SBP         | -0.03 (0.76)                          | 0.23 (0.08)             | 0.14 (0.19)           | 0.34 (<0.01)          |
| DBP         | 0.06 (0.58)                           | -0.01 (0.92)            | 0.23 (0.04)           | 0.09 (0.25)           |
| <b>WHtR</b> |                                       |                         |                       |                       |
| SBP         | 0.22 (0.04)                           | 0.35 (0.01)             | 0.32 (<0.01)          | 0.40 (<0.01)          |
| DBP         | 0.25 (0.02)                           | 0.01 (0.92)             | 0.33 (<0.01)          | 0.27 (<0.01)          |

171 BMI, body mass index; SBP, systolic blood pressure; DBP, diastolic blood pressure; WC, waist  
 172 circumference; WHR, waist hip ratio; WHtR, waist height ratio.

173

174

## 175 **Discussion**

176 Although there were almost twice as many females as males in the current study, their ages were  
177 similar. The numbers drawn from secondary and primary schools, and, also, private and public  
178 schools were approximately equal. One in thirteen and 2 in 11 participants had hypertensive and  
179 prehypertensive SBPs respectively, and, using DBPs, 1 in 14 participants were prehypertensive.

180 When the two BP categories were combined, 1 in 12 participants, a majority of whom were males  
181 were prehypertensive-to-hypertensive, with mean SBP in males higher than in females. This agrees  
182 with recent data from urban Kenya, although with participants drawn only from urban primary  
183 schools, that showed comparable proportions having elevated to stage 1 hypertension (5).  
184 Comparing males and females in either secondary or primary schools, males had higher SBPs  
185 while females had higher DBPs. This has been demonstrated before where mean SBP was  
186 significantly higher in boys than in girls with the mean DBP exactly opposite (10). The current  
187 study provides the first description BC variables have on SBP in school-going Kenyan children  
188 and adolescents at a time childhood onset hypertension is noted to be on the rise in Africa(2).

189 Using proposed correlation coefficients for interpreting medical data (19), WC, BMI and WHtR  
190 had fair (+0.3 to +0.5) correlations while WHR had no correlation with SBP among males. For  
191 females, WC, WHtR, WHR and BMI all showed fair (+0.3 to +0.4) positive correlation with SBP.  
192 In females, BMI, WC and WHtR all had fair (+0.3) positive correlation with DBP, and no  
193 correlation existed for WHR. Only WC had significant positive correlation with DBP among  
194 males, but this, too, was poor (+0.2). While some previous studies, although among older  
195 populations, found WC and WHR having higher correlation to high BP compared to BMI (3), the

196 current study found BMI having a greater correlation compared to WHR in males but not in  
197 females. Like in Chaudhary et al (2019), WC had higher correlation to SBP compared to BMI for  
198 both sexes ( R values 0.50 versus 0.40 for males and 0.43 versus 0.32 for females). Another area  
199 of divergence in the current study was that WHtR had higher correlation to higher SBP when  
200 compared to WHR in males and females. Like has been shown before, these BC variables  
201 correlated more with SBP than they did with DBP, and, where they did for DBP, it was only among  
202 females except for WC among males agreeing with Chaudhary et al (2019) when showing WC as  
203 the single most important variable for DBP correlation in older males and females (3). Elsewhere  
204 in urban South Africa, BMI and WC correlated with SBP for both boys and girls but not with DBP  
205 among boys (8, 9), largely agreeing with the current findings except for the diversion where the  
206 current study found BMI only and not together with WC as correlating with DBP among boys.  
207 Non-African studies, however, differ where weight, WHtR and BMI significantly correlated not  
208 only with SBP but also with DBP for both sexes (7, 10).

209 When data were disaggregated based on participants sex and whether they were in primary or  
210 secondary schools, there were mixed results. There was fair positive correlation between WHtR  
211 and WC on one side and SBP on the other for males in secondary schools while for those in primary  
212 schools, this fair correlation was instead seen in BMI and WC. For the females, all of BMI, WC,  
213 WHR and WHtR significantly correlated fairly with SBP in both primary and secondary schools  
214 alike. It was evident that across both sexes and in all school levels, WC was the only BC variable  
215 providing a positive significant correlation with SBP, which could be could explained from recent  
216 findings that WC has a positive association to arterial stiffness and that it affects vascular health  
217 directly (20, 21). The finding on WC could be utilized for both males and females in primary and  
218 secondary schools to predict whether they are likely to have a higher SBP. Among females in

219 either primary or secondary schools, that BMI, WC, WHR and WHtR all showed positive  
220 significant correlation to SBP shows their predictive value in SBP level estimation in such groups,  
221 an application absent in males. Higher BMI among primary school children has been demonstrated  
222 to contribute to elevated-to-stage-1 hypertension in nearly half of previously studied cohorts (5).  
223 For males, it appeared only WC would be applicable for boys in both school category, with BMI  
224 only applicable in primary schools and both WHR and WHtR applicable among secondary school  
225 boys, complicating wholesome application. For both school categories, no BC variable correlated  
226 with DBP among males while among girls in secondary schools, the correlation between BMI,  
227 WC and WHtR on one side and DBP on the other was fair while that between WHR and DBP was  
228 poor though statistically significant. Among primary school girls, BMI and WHtR had poor but  
229 significant correlations with DBP, while no correlations were observed between DBP and either  
230 WC or WHR. Similar disparities have previously been demonstrated between sexes where WC for  
231 instance has been demonstrated as a more powerful predictor of higher BP in males and not females  
232 (22, 23).

233 Considering whether participants in the current study were from private or public schools, BMI,  
234 WC and WHtR all positively correlated (fair; +0.3 to +0.6) with the SBP for both boys and girls  
235 from both sets of schools. Higher BMI has been shown to correlate with higher BP in public  
236 schools' adolescents in Cameroon (24), but there is paucity of comparable data for private schools  
237 from the African region. The WHR had no correlation with SBP in boys and only in females from  
238 public schools did it manifest a fair and significant correlation. Such inconsistencies involving  
239 WHR correlation with SBP have been described in other studies although involving private school  
240 children from outside Africa (25), only. While all three of BMI, WC and WHtR appear applicable  
241 in predicting how high SBP in such a cohort as the current might be regardless of what type of

242 school participants attend, it looks feasible to say that WHR would only be applicable in females  
243 attending public schools, weakening its applicability over the rest. On the other hand, using BC to  
244 predict DBP among children and adolescents in school is not as straightforward as it appears for  
245 SBP. While for instance in private schools the WC and WHtR correlated with DBP among males  
246 in a fair range, no BC measurement correlated with DBP in boys from public schools. The WHtR,  
247 WC and BMI significantly correlated with DBP among females from private and public schools  
248 alike. Here, too, the WHR appeared unrealistic for use in predicting DBP in males from both school  
249 types and had mixed results among females, being appearing applicable in private but not public  
250 schools.

## 251 **Limitations**

252 Two research assistants performed the BC measurements and this may have contributed some  
253 individual differences that affected the results that we could not control for, despite having trained  
254 the assistants together. Additionally, the BP measurements were done in a single session and using  
255 different (though calibrated) BP machines, and this may have affected conclusions on  
256 classification based on the once-off values.

## 257 **Conclusion**

258 Among children and adolescents of both sexes and school levels, WC correlated strongest with  
259 SBP with WHR weakest in males and females, underlining its applicability in predicting SBP in  
260 Kenyan children and adolescents. For DBP, only in females especially in secondary schools were  
261 the BC variables correlatable, limiting their application in DBP prediction among males and  
262 primary school females. The BMI, WC and WHtR all fairly-to-moderately correlated with the SBP  
263 for both sexes from private and public schools and appear applicable for predicting SBP in such  
264 cohorts, while WHR may only be applicable in females attending public schools. Use of BC to

265 predict DBP had mixed results for private versus public schools, but WHR was clearly unrealistic  
266 for use in predicting DBP in both sexes and in both school categories except, weakly, for girls in  
267 private and secondary.

## 268 **Acknowledgement**

269 KM was supported by the Consortium for Advanced Research Training in Africa (CARTA).  
270 CARTA is jointly led by the African Population and Health Research Center and the University  
271 of the Witwatersrand and funded by the Carnegie Corporation of New York (Grant No. G-19-  
272 57145), Sida (Grant No:54100113), Uppsala Monitoring Center, Norwegian Agency for  
273 Development Cooperation (Norad), and by the Wellcome Trust [reference  
274 no. 107768/Z/15/Z] and the UK Foreign, Commonwealth & Development Office, with support  
275 from the Developing Excellence in Leadership, Training and Science in Africa (DELTAS Africa)  
276 programme. The statements made and views expressed are solely the responsibility of the Fellow.

## 277 **References**

- 278 1. Zhang W, He, K., Zhao, H., Hu, X., Yin, C., Zhao, X., & Shi, S. (2021). Association of body  
279 mass index and waist circumference with high blood pressure in older adults. *BMC geriatrics*,  
280 21(1), 260. <https://doi.org/10.1186/s12877-021-02154-5>.
- 281 2. Craig A BY, Gafane-Mateman LF, Norris SA, Kruger R. Detecting and Managing  
282 Childhood Onset Hypertension in Africa: A Call to Action. *Curr Hypertens Rep*. 2023 Jun 15. doi:  
283 10.1007/s11906-023-01247-3. Epub ahead of print. PMID: 37318686.
- 284 3. Chaudhary S, Alam M, Singh S, Deuja S, Karmacharya P, Mondal M. Correlation of Blood  
285 Pressure with Body Mass Index, Waist Circumference and Waist by Hip Ratio. *Journal of Nepal*  
286 *Health Research Council*. 2019 Jan 28;16(41):410-3. PubMed PMID: 30739931. Epub  
287 2019/02/12. eng.
- 288 4. Ondimu DO, Kikvi, G. M., & Otieno, W. N. (2019). Risk factors for hypertension among  
289 young adults (18-35) years attending in Tenwek Mission Hospital, Bomet County, Kenya in 2018.  
290 *The Pan African medical journal*, 33, 210. <https://doi.org/10.11604/pamj.2019.33.210.18407>.
- 291 5. Gewa CA, Onyango, A. C., Opiyo, R. O., Gittelsohn, J., & Cheskin, L. J. (2022). Patterns  
292 and predictors of elevated blood pressure and hypertension among primary school children in

- 293 urban Kenya. *Journal of hypertension*, 40(12), 2513–2520.  
294 <https://doi.org/10.1097/HJH.0000000000003287>.
- 295 6. Crouch SH, Soepnel, L. M., Kolkenbeck-Ruh, A., Maposa, I., Naidoo, S., Davies, J., Norris,  
296 S. A., & Ware, L. J. (2021). *Paediatric Hypertension in Africa: A Systematic Review and Meta-*  
297 *Analysis*. *EClinicalMedicine*, 43, 101229. <https://doi.org/10.1016/j.eclinm.2021.101229>.
- 298 7. Pinheiro G, Mello, J., Gaya, A., & Gaya, A. R. (2021). *Blood Pressure in Children:*  
299 *Association with Anthropometric Indicators, Body Composition, Cardiorespiratory Fitness and*  
300 *Physical Activity*. *Pressão Arterial de Crianças: Associação a Indicadores Antropométricos,*  
301 *Composição Corporal, Aptidão Cardiorrespiratória e Atividade Física*. *Arquivos brasileiros de*  
302 *cardiologia*, 116(5), 950–956. <https://doi.org/10.36660/abc.20190520>.
- 303 8. Gomwe H, Seekoe, E., Lyoka, P., & Marange, C. S. (2019). *The relationship between body*  
304 *composition and blood pressure among primary school children in Eastern Cape province, South*  
305 *Africa*. *African journal of primary health care & family medicine*, 11(1), e1–e6.  
306 <https://doi.org/10.4102/phcfm.v11i1.2000>.
- 307 9. Gomwe H, Seekoe, E., Lyoka, P., Marange, C. S., (2022). *Blood pressure profile of*  
308 *primary school children in Eastern Cape province, South Africa: prevalence and risk factors*. *BMC*  
309 *pediatrics*, 22(1), 207
- 310 10. Aparicio-Cercós C, Alacreu, M., Salar, L., & Moreno Royo, L. (2020). *Waist-to-height*  
311 *ratio and skipping breakfast are predictive factors for high blood pressure in adolescents*.  
312 *Scientific reports*, 10(1), 16704. <https://doi.org/10.1038/s41598-020-73355-y>.
- 313 11. Pazin DC, da Luz Kaestner, T. L., Olandoski, M., Baena, C. P., de Azevedo Abreu, G.,  
314 Kuschnir, M. C. C., Bloch, K. V., & Faria-Neto, J. R. (2020). *Association Between Abdominal*  
315 *Waist Circumference and Blood Pressure In Brazilian Adolescents With Normal Body Mass Index:*  
316 *Waist circumference and blood pressure in Adolescents*. *Global heart*, 15(1), 27.  
317 <https://doi.org/10.5334/gh.779>.
- 318 12. Ross R NI, Yamashita S, Shai I, Seidell J, Magni P, Santos RD, Arsenault B, Cuevas A, Hu  
319 FB, Griffin BA, Zambon A, Barter P, Fruchart JC, Eckel RH, Matsuzawa Y, Després JP. *Waist*  
320 *circumference as a vital sign in clinical practice: a Consensus Statement from the IAS and ICCR*  
321 *Working Group on Visceral Obesity*. *Nat Rev Endocrinol*. 2020 Mar;16(3):177-189. doi:  
322 10.1038/s41574-019-0310-7. Epub 2020 Feb 4. PMID: 32020062; PMCID: PMC7027970.
- 323 13. WHO *Waist circumference and waist-hip ratio: Report of a WHO expert consultation*  
324 *Geneva 8-11. 2008*.
- 325 14. Kruger HS, Faber, M., Schutte, A. E., & Ellis, S. M. (2013). *A proposed cutoff point of*  
326 *waist-to-height ratio for metabolic risk in African township adolescents*. *Nutrition (Burbank, Los*  
327 *Angeles County, Calif.)*, 29(3), 502–507. <https://doi.org/10.1016/j.nut.2012.08.009>.
- 328 15. Matsha TE, Kengne, A. P., Yako, Y. Y., Hon, G. M., Hassan, M. S., & Erasmus, R. T. (2013).  
329 *Optimal waist-to-height ratio values for cardiometabolic risk screening in an ethnically diverse*  
330 *sample of South African urban and rural school boys and girls*. *PloS one*, 8(8), e71133.  
331 <https://doi.org/10.1371/journal.pone.0071133>.
- 332 16. Jiang Y, Dou, Y. L., Xiong, F., Zhang, L., Zhu, G. H., Wu, T., Zhang, Y., & Yan, W. L.  
333 (2018). *Waist-to-height ratio remains an accurate and practical way of identifying*



- 334 *cardiometabolic risks in children and adolescents. Acta paediatrica (Oslo, Norway : 1992),*  
335 *10.1111/apa.14323. Advance online publication. <https://doi.org/10.1111/apa.14323>.*
- 336 17. *Centers for Disease Control and Prevention A SAS Program for the 2000 CDC Growth*  
337 *Charts (ages 0 to <20 years) Division of Nutrition Physical Activity and Obesity NCF, Disease*  
338 *Control and Prevention Atlanta GA USA 2014.*
- 339 18. *Gidding SS, Whelton, P. K., Carey, R. M., Flynn, J., Kaelber, D. C., & Baker-Smith, C.*  
340 *(2019). Aligning Adult and Pediatric Blood Pressure Guidelines. Hypertension (Dallas, Tex. :*  
341 *1979), 73(5), 938–943. <https://doi.org/10.1161/HYPERTENSIONAHA.119.12653>.*
- 342 19. *Akoglu H. User's guide to correlation coefficients Turk J Emerg Med. 2018 Aug;18(3):91-*  
343 *93.*
- 344 20. *Guimarães Filho GC, Silva LT, Silva RMCE. Correlation among Waist Circumference and*  
345 *Central Measures of Blood Pressure. . Arquivos brasileiros de cardiologia. 2022 Aug;119(2):257-*  
346 *264.*
- 347 21. *Campana EMG, Brandão AA. 2022 Aug. Waist Circumference: A Parameter of Vascular*  
348 *Health. Arq Bras Cardiol. . 119(2):265-266 English, Portuguese doi: 1036660/abc20220508*  
349 *PMID: 35946688; PMCID: PMC9363067.*
- 350 22. *Nițescu M S-CA, Tusaliu M, Pițigoi D, Oțelea M. Correlation Between the Waist*  
351 *Circumference, Diastolic Blood Pressure and Insulin Resistance in Non-Obese Young Adults. Acta*  
352 *Endocrinol (Buchar). 2016 Oct-Dec;12(4):493-499. doi: 10.4183/aeb.2016.493. PMID:*  
353 *31149139; PMCID: PMC6535238.*
- 354 23. *Erdal İ, Yalçın SS, Aksan A, Gençal D, Kanbur N. 2020 Sep 25; How useful are*  
355 *anthropometric measurements as predictive markers for elevated blood pressure in adolescents in*  
356 *different gender? J Pediatr Endocrinol Metab. 33(9):1203-1211. doi: 10.1515/jpem-2020-0175.*  
357 *PMID: 32829316.*
- 358 24. *Kamdem F, Bika Léle EC, Hamadou B, Obe Meyong MAP, Fenkeu Kweban J, Moussa O,*  
359 *et al. 2023 Aug. Prevalence and risk factors of pre-hypertension and high blood pressure among*  
360 *adolescents in Cameroonian schools. J Clin Hypertens (Greenwich). 10. doi: 10.1111/jch.14711.*  
361 *Epub ahead of print. PMID: 37561361.*
- 362 25. *Sebati B MK, Makgae P. An Assessment of the Relationship between Anthropometric*  
363 *Parameters and Blood Pressure among Polokwane Private School Children. Children (Basel).*  
364 *2020 Apr 3;7(4):29. doi: 10.3390/children7040029. PMID: 32260220; PMCID: PMC7231101.*  
365  
366  
367
